# Supplementary material for: Photogenerated carrier behavior at a gas–solid interface for CO2 adsorption on Cs2AgBiBr6 nanocrystals
Source: Royal Society of Chemistry journal article supplement (doi:10.1039/d2dt03248a), 2022-01-01
Supplement: d2dt03248a1.pdf [file d2dt03248a1.pdf]

## Electronic supplementary information (ESI)

Photo-generated carrier behavior at gas-solid interface for CO<sub>2</sub> adsorption on Cs<sub>2</sub>AgBiBr<sub>6</sub> nanocrystals

Rui Zhang <sup>a</sup>, Linjia Li <sup>a</sup>, Bo Tang <sup>b</sup>, Dejun Wang <sup>a</sup>, Yanhong Lin <sup>a</sup> and Tengfeng Xie<sup>a\*</sup>

<sup>a</sup> College of Chemistry, Jilin University, Changchun, 130012, P. R. China

<sup>b</sup> State Key Laboratory of Urban Water Resource and Environment, Harbin Institute of Technology, Harbin 150090, China;

Email of corresponding author: [xietf@jlu.edu.cn](mailto:xietf@jlu.edu.cn).

### Experimental Section

#### Materials

CsBr (99.9%), BiBr<sub>3</sub> (≥ 98%) and AgBr (98%) were received from Aladdin. Dimethyl sulfoxide (DMSO 99.5%) was purchased from DAMAO Chemical Reagent Factory and isopropanol (99.7%) was from Tiantai.

#### Synthesis of Cs<sub>2</sub>AgBiBr<sub>6</sub> NCs

The precursor solution with CsBr, BiBr<sub>3</sub> and AgBr was prepared by following previous work.<sup>1</sup> That is, CsBr (0.04 M), BiBr<sub>3</sub> (0.02 M) and AgBr (0.02 M) were dissolved in 1 mL DMSO at room temperature while stirring for a while. Then, 20 mL isopropanol was slowly added to 1 mL of the above solution, until light green clear solution gradually turned orange suspension. After centrifuging and washing with isopropanol, the orange product was dried in vacuum drying chamber at 60°C for 2 h. This orange powder was Cs<sub>2</sub>AgBiBr<sub>6</sub>.

#### Characterization

X-ray diffraction (XRD) patterns was obtained on powder X-ray diffractometer (Rigaku/Ultima IV diffraction instrument with Cu K $\alpha$  radiation). The morphology information was obtained from SEM (Gemini 550 field emission scanning microscope) and TEM (JEM2200FS) images. X-ray photoelectron spectroscopy (XPS) was carried out on Thermo VG Scientific Escalab 250xi spectrometer with a monochromated Al

*Ka* excitation source. UV-vis diffuse reflectance spectrum was recorded on Shimadzu UV-3600 spectrophotometer. Fourier Transform Infra-Red (FT-IR) spectra was tested on Bruker VERTEXV 80V. Surface photovoltage (SPV) and Transit photovoltage (TPV) spectra were performed on our lab-made device.<sup>2,3</sup> For SPV testing, the testing equipment fixed with 24Hz testing frequency, was composed of a 500 W Xe lamp (CHF-XM-500 W), a monochromator (ZLolix SBP500), a lock-in amplifier (SB830-DSP) with a light chopper (SR540) and a computer. Testing transient photovoltage (TPV) spectra was on testing apparatus assembled with a 500 MHz digital phosphor oscilloscope (TDS 5054, Tektronix) and a laser pulse (Polaris II, New Wave Research, Inc). For routine SPV and TPV testing, “ITO-sample-ITO/Brass” structure was applied, however, for *in-situ* SPV and TPV (g-SPV, g-TPV) testing, a sealed device was adopted with “ITO-sample-Brass” structure in which gas can be injected.<sup>4</sup> SPV and TPV spectra of each sample were measured at least 3 times to give the right tendency.

### **Theoretical methods**

Density functional theory (DFT) calculation has been performed by using the Vienna Ab initio Simulation Package (VASP 5.4.4). We chose PBE functional based on the generalized gradient approximation to account for the exchange-correlation energy.<sup>5</sup> The kinetic energy cut-off of the plane wave basis set was set as 450 eV. A Gaussian smearing of the population of partial occupancies with a width of 0.05 eV was used during iterative diagonalization of the Kohn-Sham Hamiltonian. The threshold for energy convergence for each iteration was set to  $10^{-5}$  eV. Geometries were assumed to be converged when Hellmann-Feynman forces on each atom were less than 0.01 eV/Å. The  $3 \times 3 \times 1$  gamma-centered k-points meshes have been applied to sample the Brillouin zones of  $\text{Cs}_2\text{AgBiBr}_6$ . Optimized lattice parameters for  $\text{Cs}_2\text{AgBiBr}_6$  were  $a = 11.46$  Å.  $\Delta E_{\text{ads}}$  (adsorption energy) was calculated as  $E_{\text{ads}} = E_{\text{total}} - E_{\text{Cs}_2\text{AgBiBr}_6} - E_{\text{CO}_2}$ .

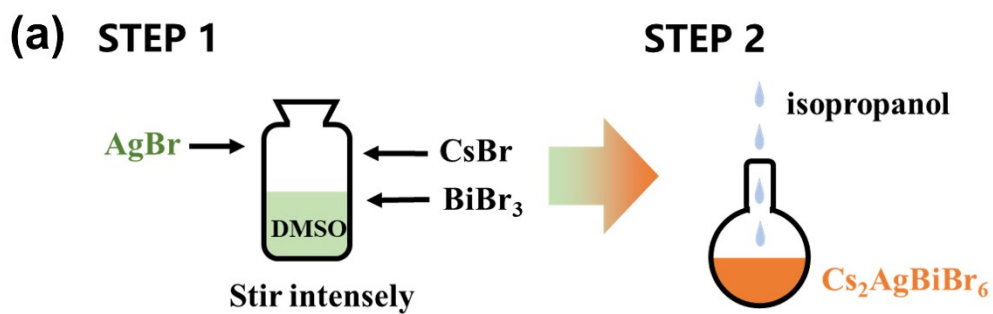

Fig. S1 Schematic illustration of synthetic procedures of Cs<sub>2</sub>AgBiBr<sub>6</sub>.

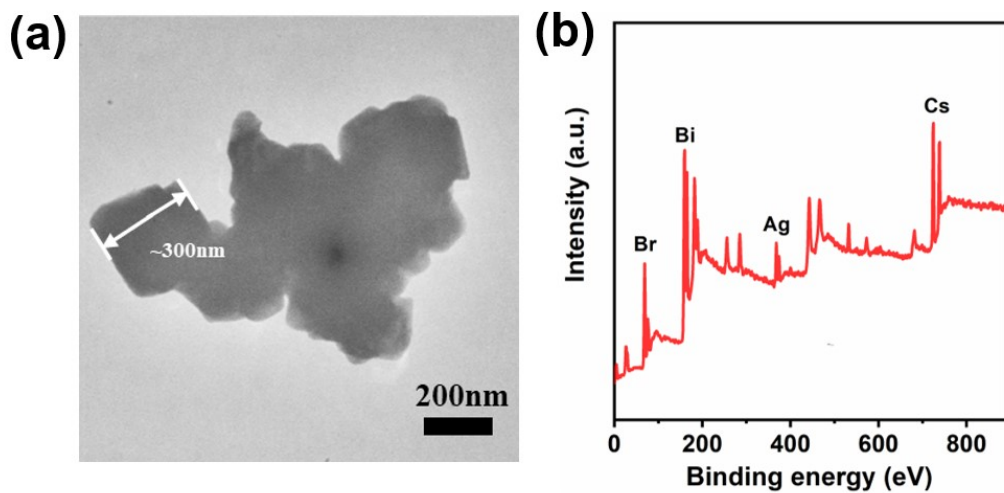

Fig. S2 (a) TEM image of Cs<sub>2</sub>AgBiBr<sub>6</sub> NCs; (b) Survey XPS spectrum of the sample.

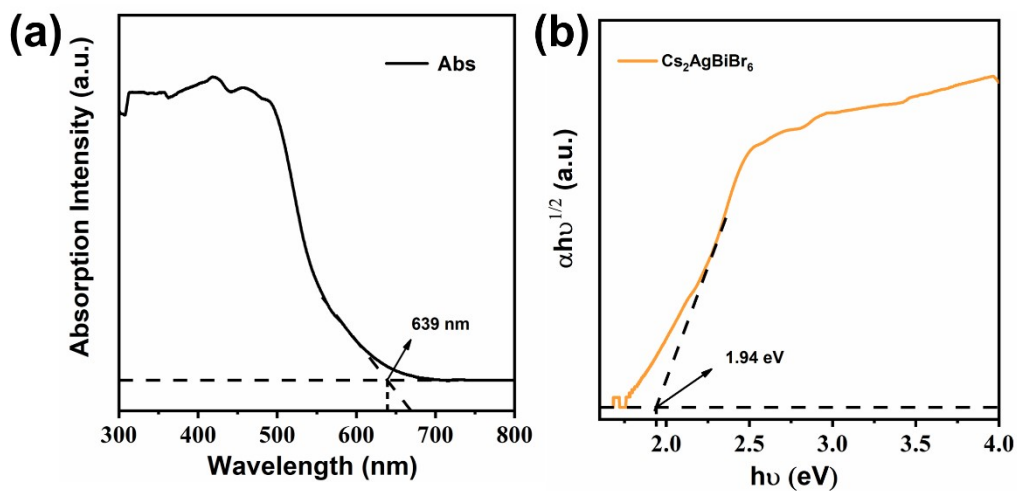

Fig. S3 (a) UV-vis spectrum of Cs<sub>2</sub>AgBiBr<sub>6</sub> XPS (b)  $(\alpha h\nu)^{1/2}$  versus  $h\nu$  curves.

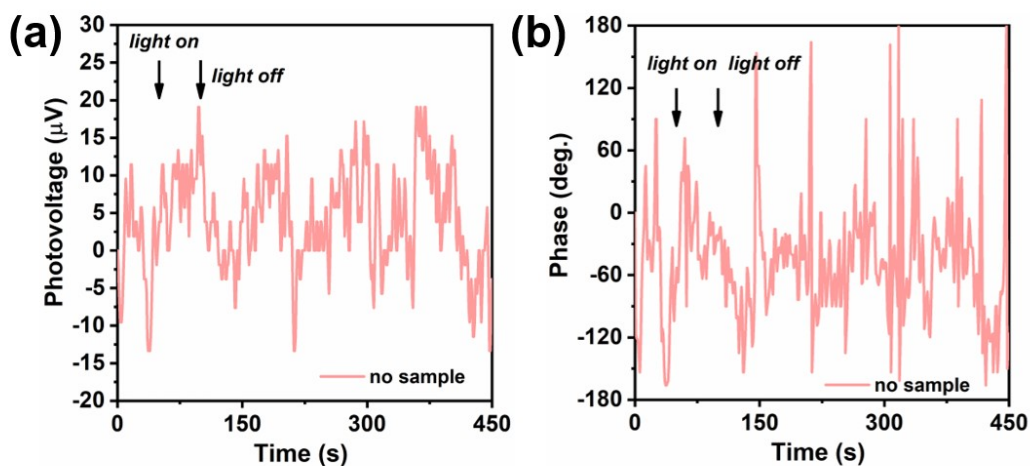

**Fig. S4** Blank SPV spectra without the testing sample under 405 nm laser irradiation (a) photovoltage intensity (b) corresponding phase spectrum

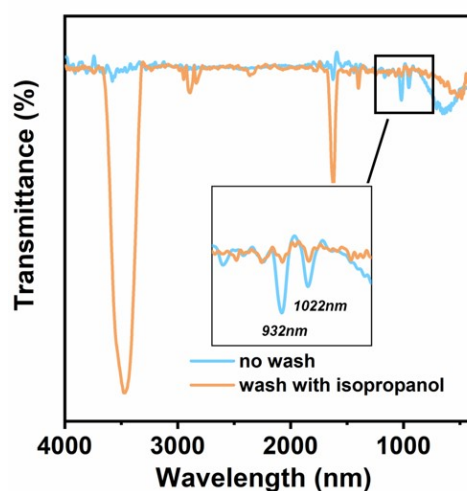

**Fig. S5** FT-IR spectra of  $\text{Cs}_2\text{AgBiBr}_6$  with and without washing with isopropanol

## References

1. D. Wu, X. Zhao, Y. Huang, J. Lai, H. Li, J. Yang, C. Tian, P. He, Q. Huang and X. Tang, *Chem. Mater.*, 2021, **33**, 4971-4976.
2. R. Zhang, L. Bi, D. Wang, Y. Lin, X. Zou, T. Xie and Z. Li, *J. Colloid Interf. Sci.*, 2020, **578**, 431-440.
3. R. Zhang, L. Bi, D. Wang, Y. Lin, X. Zou and T. Xie, *Catal. Commun.*, 2020, **142**, 106028
4. T. Yamada, Z. H., H. Uchida, I. Honma and T. Katsube, *J. Phys. Chem. B* 2004, **108**, 13341.
5. M. Shi, G. Li, W. Tian, S. Jin, X. Tao, Y. Jiang, E. A. Pidko, R. Li and C. Li, *Adv. Mater.*, 2020, **32**, 2002137.
